# Supplementary figures and images for: Role of inducible nitric oxide synthase pathway on methotrexate-induced intestinal mucositis in rodents
Source: Springer Nature journal article supplement (doi:10.1186/1471-230x-11-90), 2011-08-16

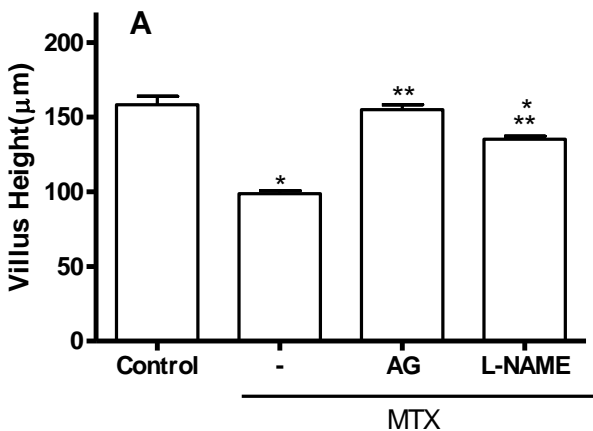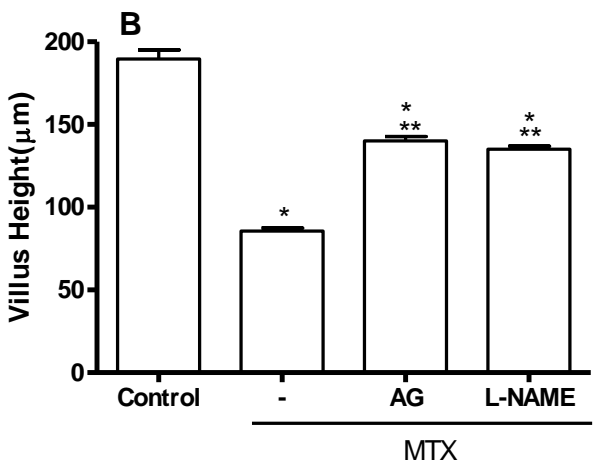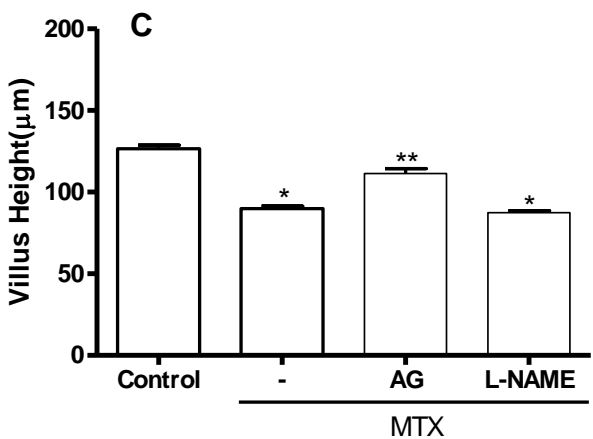

Supplement: 12876_2011_625_MOESM1_ESM.pdf [file 12876_2011_625_MOESM1_ESM.pdf]

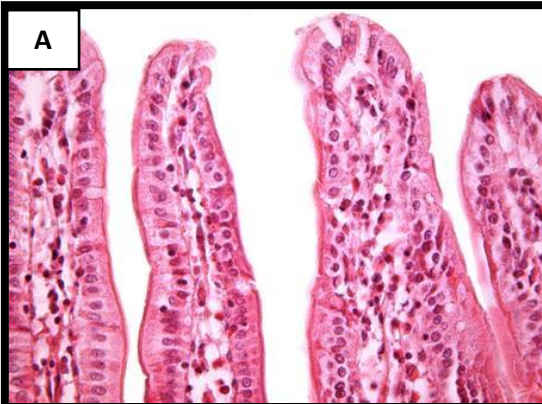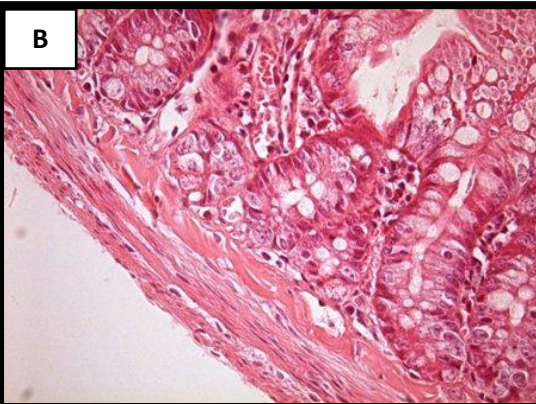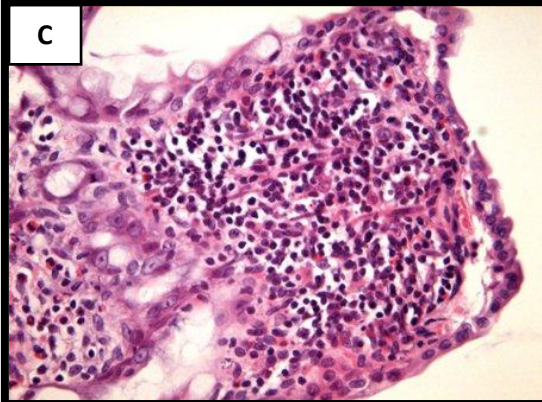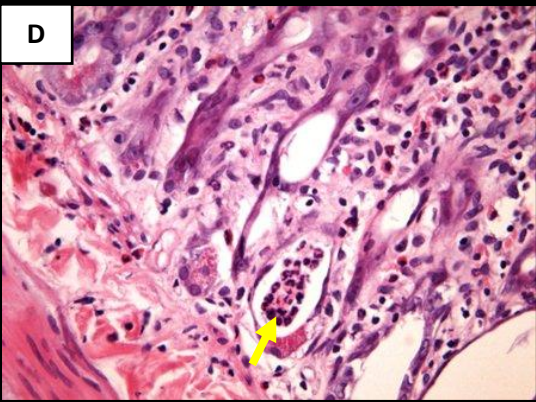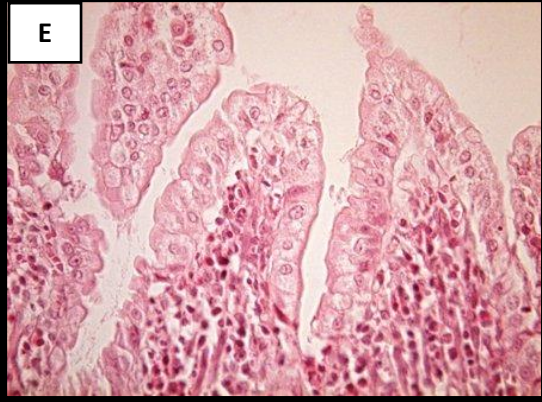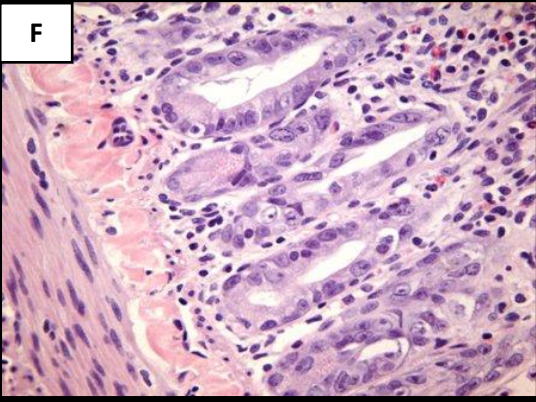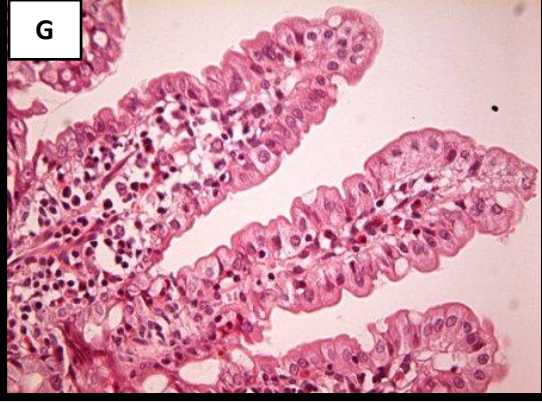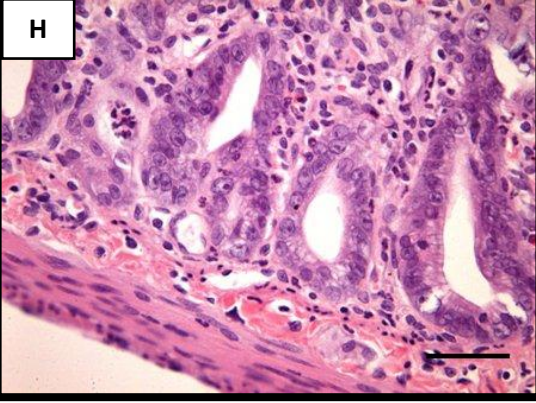

Supplement: 12876_2011_625_MOESM2_ESM.pdf [file 12876_2011_625_MOESM2_ESM.pdf]

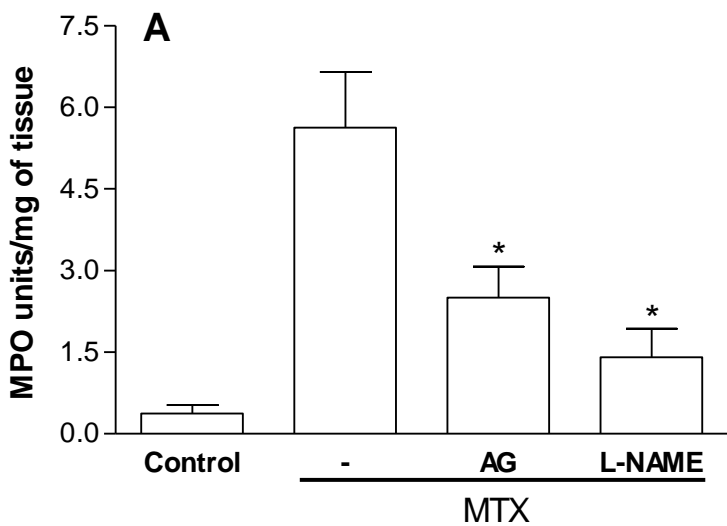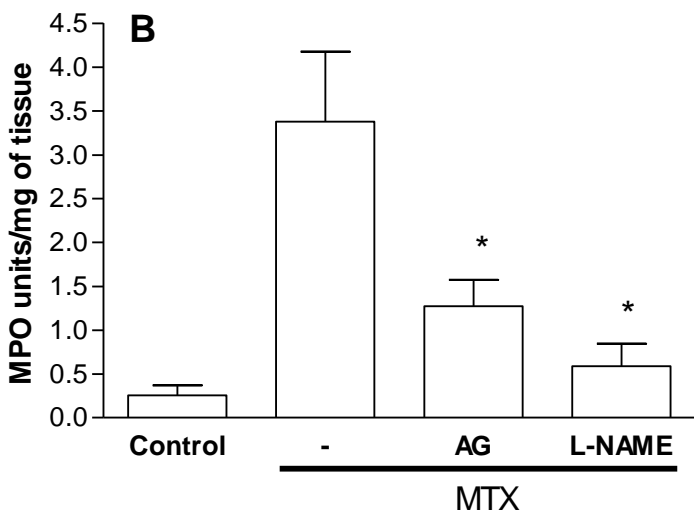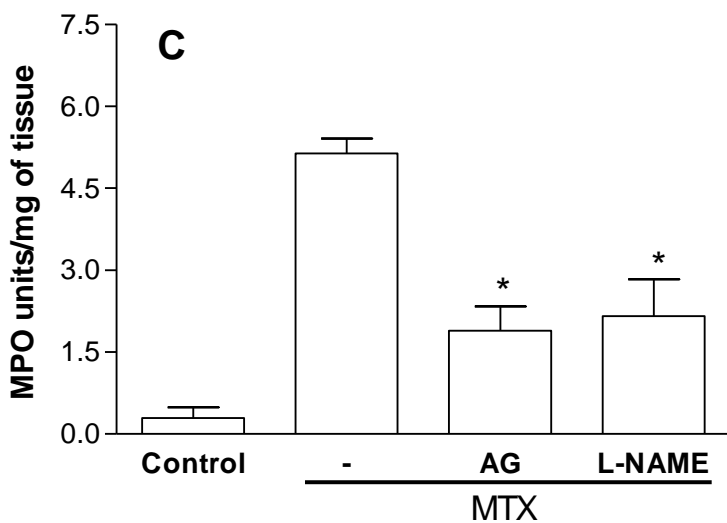

Supplement: 12876_2011_625_MOESM3_ESM.pdf [file 12876_2011_625_MOESM3_ESM.pdf]

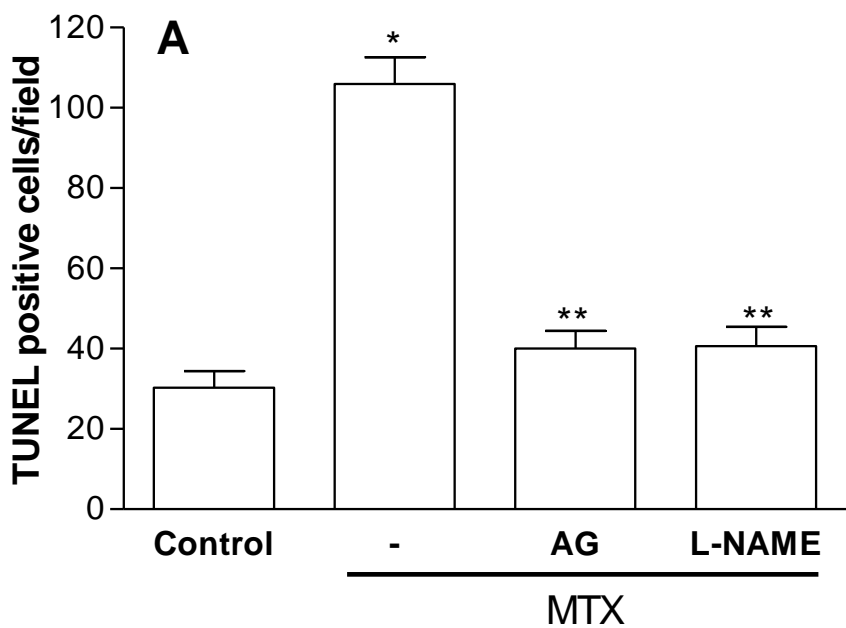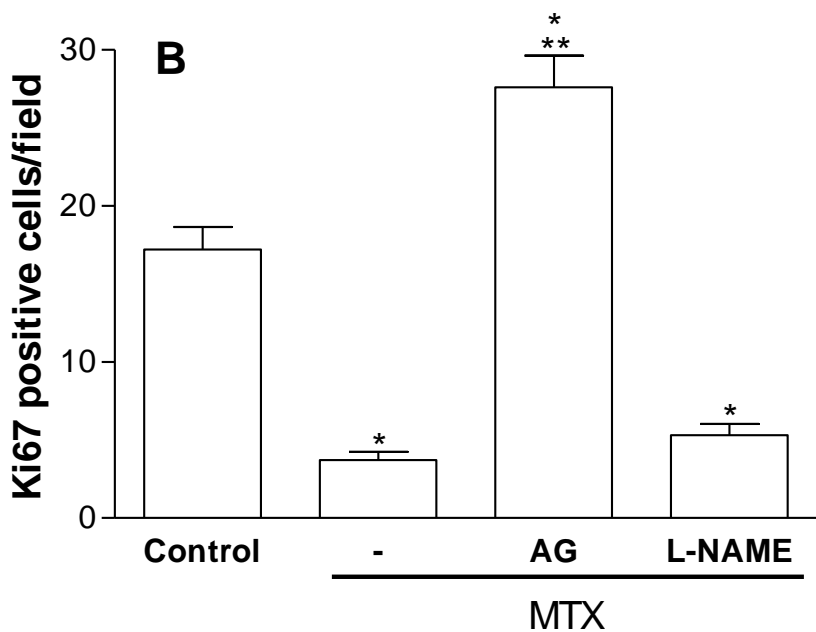

Supplement: 12876_2011_625_MOESM4_ESM.pdf [file 12876_2011_625_MOESM4_ESM.pdf]

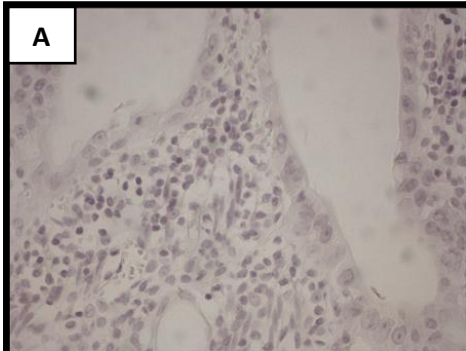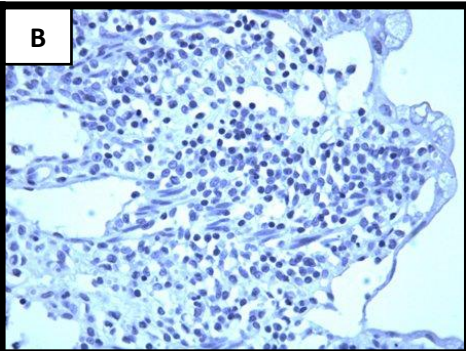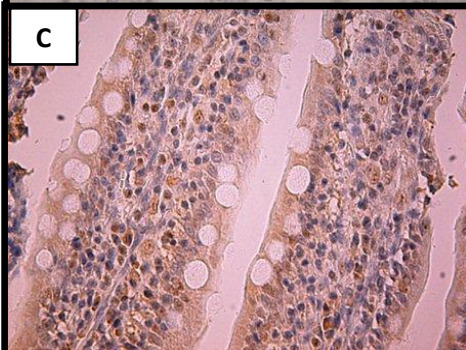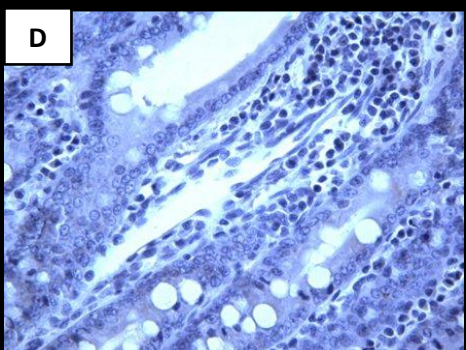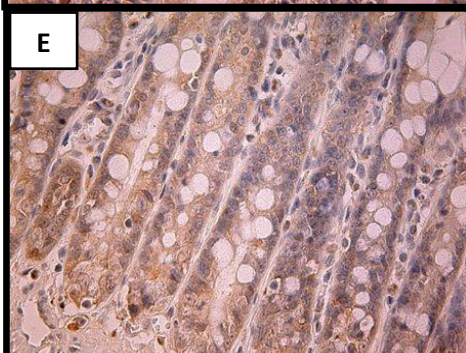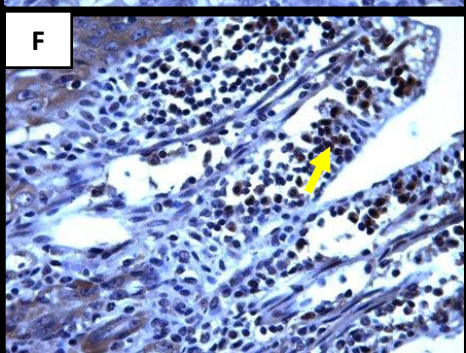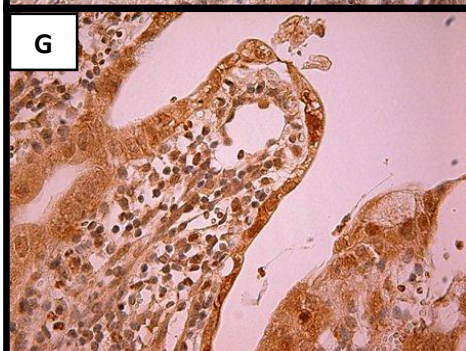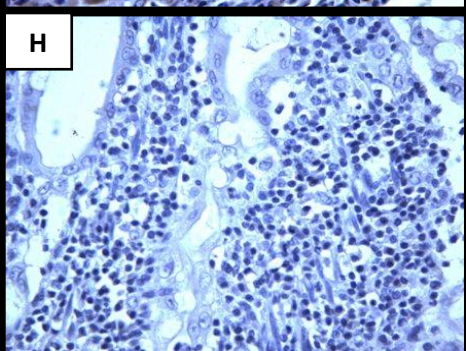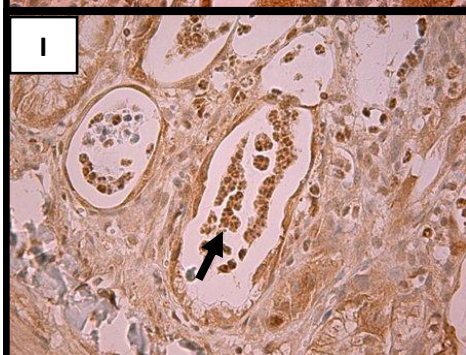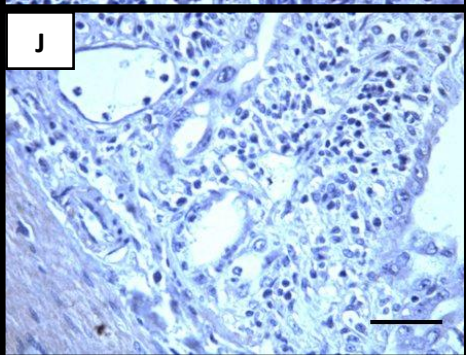

Supplement: 12876_2011_625_MOESM5_ESM.pdf [file 12876_2011_625_MOESM5_ESM.pdf]
